# Supplementary material for: Post-marketing withdrawal of anti-obesity medicinal products because of adverse drug reactions: a systematic review
Source: PubMed Central journal article supplement (PMC5126837; doi:10.1186/s12916-016-0735-y), 2016-11-29

## Web appendix 2: Databases and selected texts used to identify withdrawn anti-obesity medications, their launch dates, dates of first adverse drug reaction reports and withdrawals

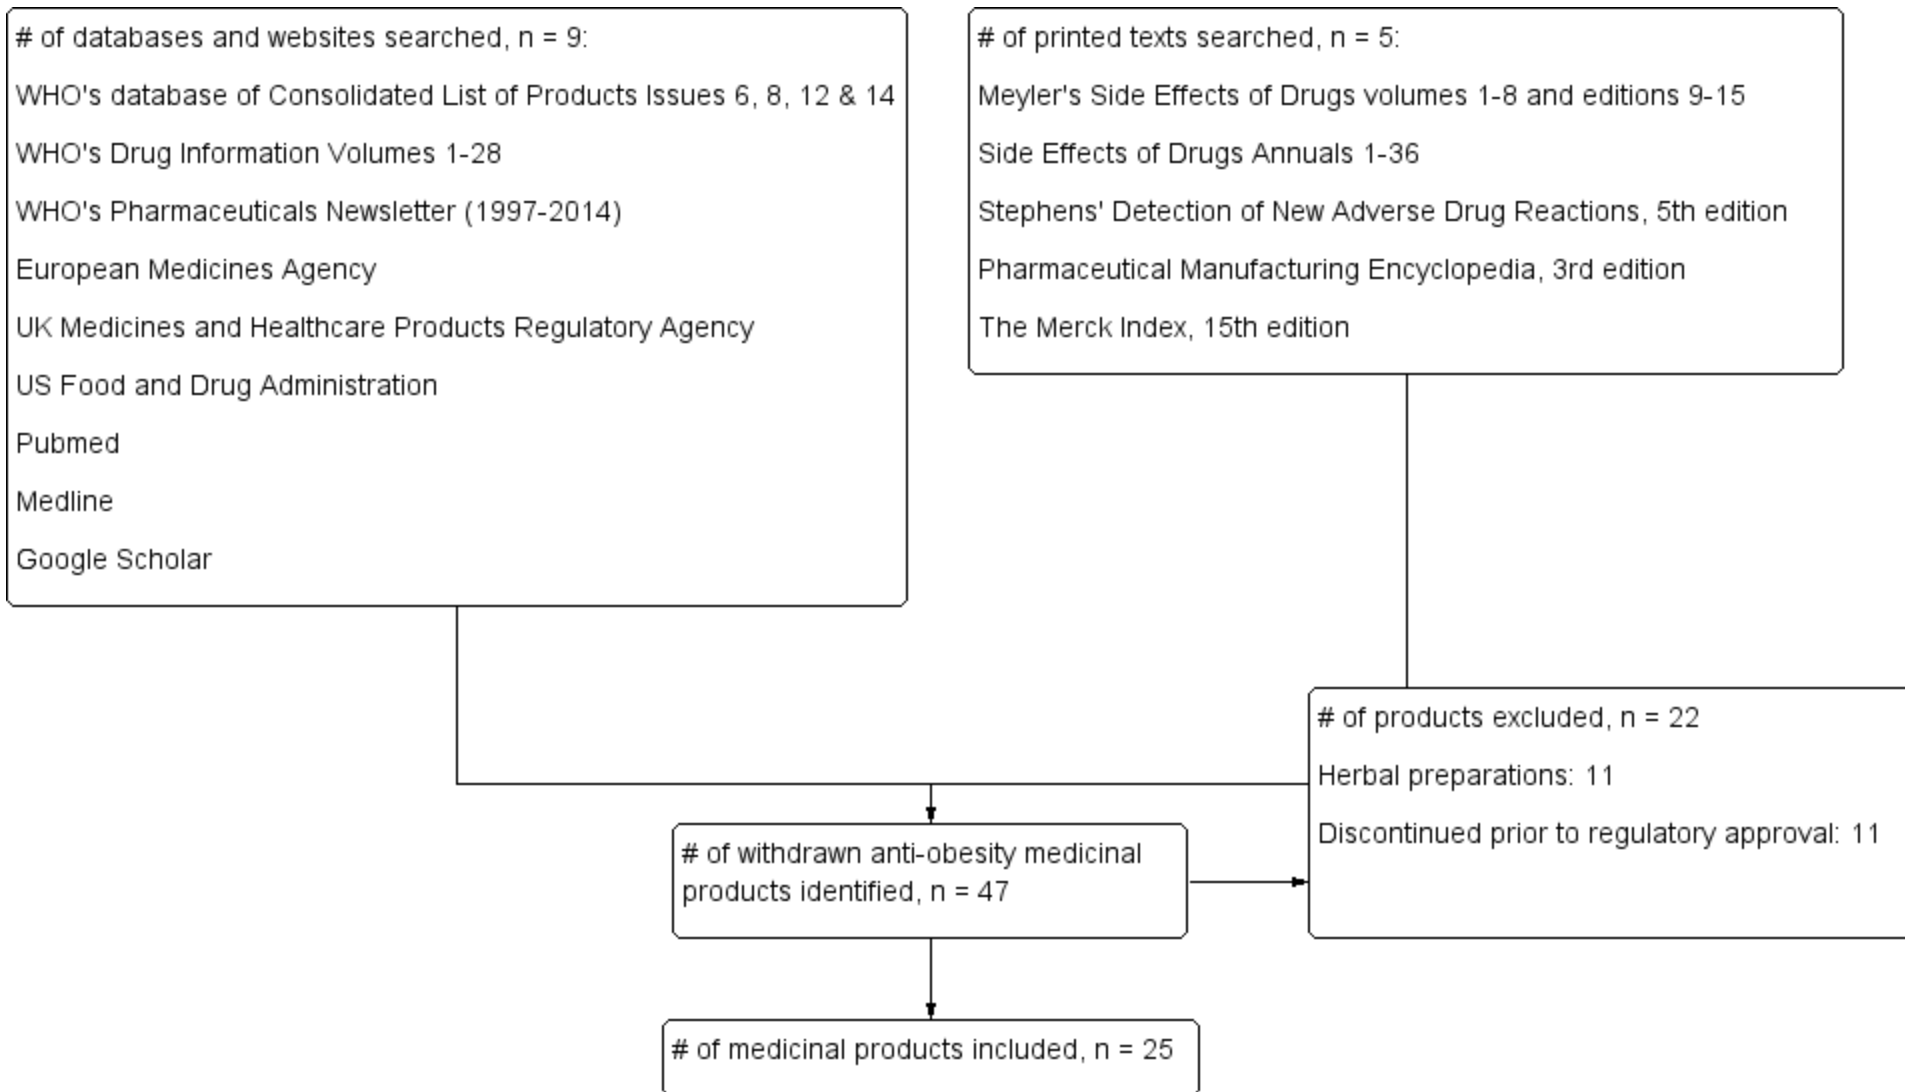

Supplement: 12916_2016_735_MOESM2_ESM.pdf [file 12916_2016_735_MOESM2_ESM.pdf]
