# Supplementary material for: Post-marketing withdrawal of anti-obesity medicinal products because of adverse drug reactions: a systematic review
Source: PubMed Central journal article supplement (PMC5126837; doi:10.1186/s12916-016-0735-y), 2016-11-29
Supplement: 12916_2016_735_MOESM4_ESM.pdf [file 12916_2016_735_MOESM4_ESM.pdf]

# Web appendix 4: Publication trends\* for scientific articles related to obesity prevalence and treatments over time

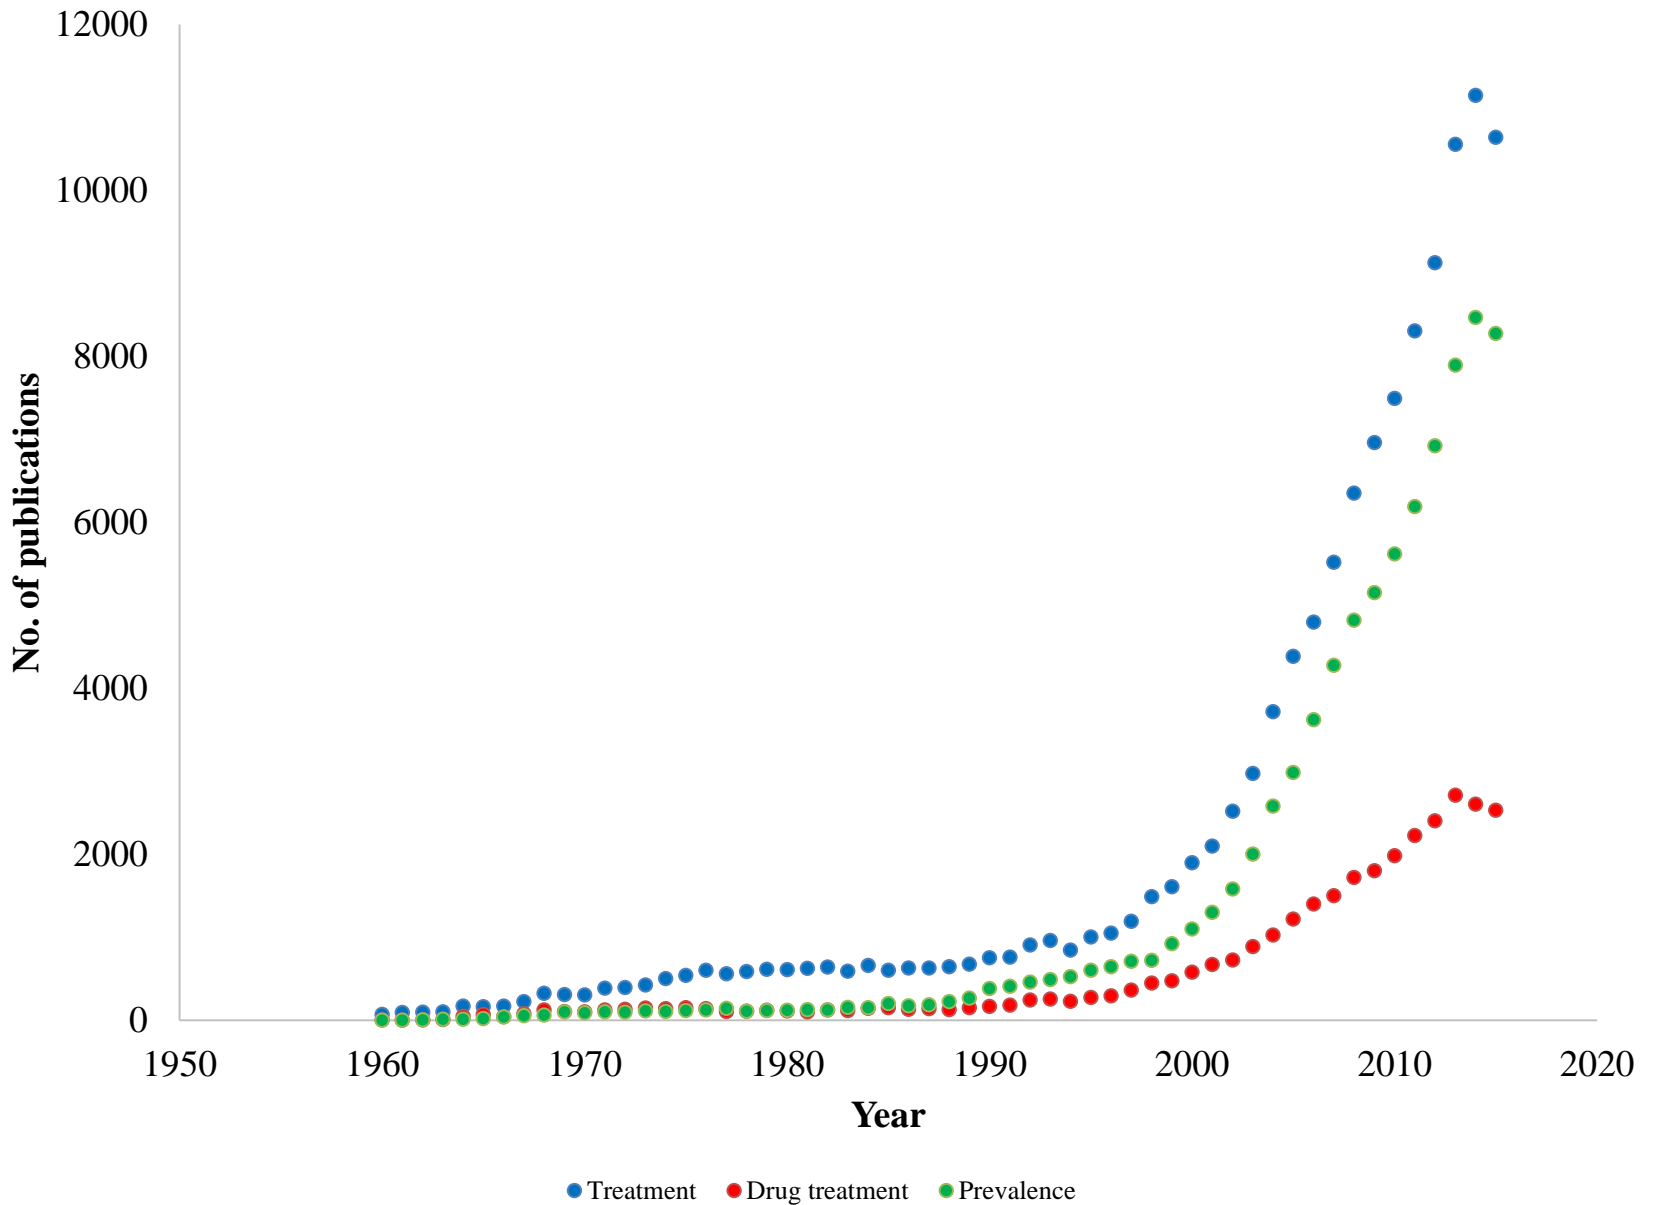

\*Data sourced using PubMed trends
