# Supplementary material for: Post-marketing withdrawal of anti-obesity medicinal products because of adverse drug reactions: a systematic review
Source: Springer Nature journal article supplement (doi:10.1186/s12916-016-0735-y), 2016-11-21
Supplement: MOESM1 [file 11102248]

## **Web Appendix 1: Extended search lists of accessed sources used to identify anti-obesity medicinal products withdrawn from the market because of adverse drug reactions.**

**The United Nations (UN) Consolidated List of Products whose consumption and/or sale have been banned, withdrawn, severely restricted, or not approved by governments:** Issue 6 (pgs. 5-197); Issue 8 (pgs. 30-264); Issue 12 (pgs. 31-203); and Issue 14 (pgs. 3-26)

### **W.H.O. Drug Information: Regulatory Matters Section**

2015: Vol. 29, Nos 1-4

2014: Vol. 28, Nos 1-4

2013: Vol. 27, Nos 1-4

2012: Vol. 26, Nos 1-4

2011: Vol. 25, Nos 1-4

2010: Vol. 24, Nos 1-4

2009: Vol. 23, Nos 1-4

2008: Vol. 22, Nos 1-4

2007: Vol. 21, Nos 1-4

2006: Vol. 20, Nos 1-4

2005: Vol. 19, Nos 1-4

2004: Vol. 18, Nos 1-4

2003: Vol. 17, Nos 1-4

2002: Vol. 16, Nos 1-2

2001: Vol. 15, Nos 1-4

2000: Vol. 14, Nos 1-4

1999: Vol. 13, Nos 1-4

1998: Vol. 12, Nos 1-4

1997: Vol. 11, Nos 1-4

1996: Vol. 10, Nos 1-4

1995: Vol. 9, Nos 1-4

1994: Vol. 8, Nos 1-4

1993: Vol. 7, Nos 1-2

1992: Vol. 6, Nos 1-4

1991: Vol. 5, Nos 1-3

1990: Vol. 4, Nos 1-4

1989: Vol. 3, Nos 1-4

1988: Vol. 2, Nos 1-4

1987: Vol. 1, Nos 1-3

### **W.H.O. Pharmaceuticals Newsletters: Regulatory Matters Section**

2015: Newsletter Nos. 1-6

2014: Newsletter Nos. 1-6

2013: Newsletter Nos. 1-6

2012: Newsletter Nos. 1-6

2011: Newsletter Nos. 1-6

2010: Newsletter Nos. 1-6

2009: Newsletter Nos. 1-5

2008: Newsletter Nos. 1-6

2007: Newsletter Nos. 1-6

2006: Newsletter Nos. 1-6

2005: Newsletter Nos. 1-5

2004: Newsletter Nos. 1-6

2003: Newsletter Nos. 1-5

2002: Newsletter Nos. 1-4

2001: Newsletter Nos. 1-3

2000: Newsletter Nos. 1-4

1999: Newsletter Nos. 1-12

1998: Newsletter Nos. 1-12

1997: Newsletter Nos. 1-12

### **European Medicines Agency (EMA)**

Find Medicine > Human Medicines > Browse by therapeutic area > Diseases > Nutritional and Metabolic Diseases > Nutrition Disorders > Overnutrition > Obesity > “Include: withdrawn post-approval, suspended”

Find Medicine > Human Medicines > Referrals > Browse by topic > Safety issues > “Include: Opinion provided by Committee for Medicinal Products for Human Use, European Commission final decision”

### **US Food and Drug Administration (FDA)**

Home > Safety > Recalls, Market Withdrawals, & Safety Alerts > Archive for Recalls, Market Withdrawals & Safety Alerts

## **The UK Medicines and Healthcare products Regulatory Agency (MHRA)**

Home > Drug safety update > Therapeutic area > Nutrition and Dietetics

**Stephens' Detection of New Adverse Drug Reactions, 5th edition, 2004** (pgs. 667-702)

**Pharmaceutical Manufacturing Manual, 3rd edition, 2006**

**The Merck Index, 15th edition, 2013**

**Meyler's Side Effects of Psychiatric Drugs 1st edition, 2009**

**Meyler's Side Effects of Cardiovascular Drugs 1st edition, 2009**

### **Medline search strategy**

“[Anti-obesity drug name]” AND “toxicity”

“[Anti-obesity drug name]” AND “adverse”

“[Anti-obesity drug name]” AND “side effect”

“[Anti-obesity drug name]” AND “poison”

“[Anti-obesity drug name]” AND “fatal\*”

“[Anti-obesity drug name]” AND “fatality”

“[Anti-obesity drug name]” AND “death”

“[Anti-obesity drug name]” AND “withdrawal”

“[Anti-obesity drug name]” AND “withdrawn”

“[Anti-obesity drug name]” AND “recall”

“[Anti-obesity drug name]” AND “voluntary recall”

“[Anti-obesity drug name]” AND “banned”

“[Anti-obesity drug name]” AND “prohibited”

“[Anti-obesity drug name]” AND “remov\*”

“[Anti-obesity drug name]” AND “discontinued”

“[Anti-obesity drug name]” AND “refus\*”

[Sort by Publication date]

### **Google Scholar search strategy**

Find articles with all of the words [anti-obesity drug name] > with the exact phrase [adverse or toxic or side effect or fatal or death or withdrawn or withdrawal or recall or banned or prohibited or discontinued or suspended] > Return articles dated between 1950-2015
