# Supplementary material for: Post-marketing withdrawal of anti-obesity medicinal products because of adverse drug reactions: a systematic review
Source: Springer Nature journal article supplement (doi:10.1186/s12916-016-0735-y), 2016-11-21
Supplement: MOESM3 [file 11102248]

### **Web appendix 3: Profiles of 23 centrally-acting anti-obesity medicinal products withdrawn over the last 50 years because of adverse drug reactions**

#### **Amfepramone**

- Mechanism of action: serotonin-norepinephrine-dopamine releasing agent
- Introduced as an anti-obesity agent in 1957
- Pickwickian syndrome attributed to its use first reported in 1974 [1]
- Withdrawn in several countries in 1974
- Fatal case of primary pulmonary arterial hypertension attributed to its use reported in the UK in 1995 [2]
- Reintroduced in the UK in 2002 with restrictions

#### **Amfetamine**

- Mechanism of action: serotonin-norepinephrine-dopamine releasing agent
- Initially used for narcolepsy
- Observed that patients with narcolepsy lost weight while taking amfetamine
- Approved in 1939 as an obesity treatment when the results of a trial showed that it was effective [3]
- Over dosage with its use as an anorectic first reported in 1957 [4]
- Several studies showed that it had a potential for abuse [5]
- Withdrawn as an anti-obesity agent in 1973
- Still largely consumed illegally as a psychostimulant
- Several cases of deaths from its misuse have been published since its withdrawal [6]

#### **Aminorex**

- Mechanism of action: serotonin reuptake inhibitor
- First introduced in 1962
- Became available within three years of introduction as an over-the-counter weight loss pill
- Between 1965 and 1972, there was a large increase in the incidence of primary pulmonary hypertension<sup>[7]</sup>
- The pulmonary hypertension epidemic ended in 1972 following withdrawal of aminorex from the market

#### **Benfluorex**

- Mechanism of action: serotonin reuptake inhibitor
- Approved in 1976 as an add-on treatment in obese patients with diabetes mellitus
- Cases of valvulopathy attributed to its use began to appear from 2003
- Withdrawn in 2009 following an epidemic of valvulopathy attributed to its use

- Several deaths reported
- To date over 3000 hospitalizations and at least 1300 deaths attributed to its use in France alone<sup>[8]</sup>

### **Chlorphentermine**

- Mechanism of action: serotonin reuptake inhibitor
- Approved for obesity treatment in 1962 based on the results of short-term clinical trials [<sup>9,10</sup>]
- In 1969, animal studies began to emerge consistently suggesting an association with an increased risk of pulmonary phospholipidosis [<sup>11,12</sup>]
- Withdrawn in the same year
- No case reports of pulmonary hypertension in humans

### **Clobenzorex**

- Mechanism of action: serotonin-norepinephrine-dopamine releasing agent
- Approved in 1966 as an appetite suppressant
- Cases of drug abuse and psychiatric adverse reactions appeared from 1986 [<sup>13</sup>]
- Withdrawn from the market in 2000

### **Cloforex**

- Mechanism of action: serotonin reuptake inhibitor
- A prodrug of chlorphentermine (see above)
- Introduced for obesity treatment in 1965
- Cases of suspected pulmonary hypertension attributed to its use reported in Germany
- Animal studies suggested an association with pulmonary vasculopathy [<sup>14</sup>]
- Withdrawn in 1967

### **Dexfenfluramine**

- Mechanism of action: serotonin reuptake inhibitor
- Approved in 1995 as an anti-obesity agent
- Several cases of cardiovascular adverse reactions reported shortly after [<sup>15</sup>]
- Withdrawn within two years of approval
- Cases of pulmonary hypertension attributed to its use were reported before regulatory approval [<sup>16,17</sup>]

### **Fenbutrazate**

- Mechanism of action: norepinephrine-dopamine releasing agent
- Approved for use in obesity in 1957
- Cases of drug abuse reported in France [<sup>18</sup>]
- First withdrawn in 1969, and then withdrawn in all of Europe in 1995 [<sup>19</sup>]

### **Fenfluramine**

- Mechanism of action: serotonin reuptake inhibitor
- First approved in in 1973
- Reports of pulmonary hypertension first appeared in 1981
- Several other case reports subsequently published
- Epidemiological studies showed an association between fenfluramine and pulmonary hypertension [20]
- Withdrawn worldwide in 1997

### **Fenproporex**

- Mechanism of action: norepinephrine releasing agent
- First approved as an anti-obesity drug in 1966
- Cases of drug abuse attributed to its use first reported in 1997 [21]
- Withdrawn in Europe and Brazil within two years of the initial reports
- A recent systematic review evidence concluded that its abuse potential and amphetamine-like adverse effects remain a cause of concern [22]

### **Levamphetamine**

- Mechanism of action: serotonin-norepinephrine-dopamine releasing agent
- Introduced in 1944 as an anti-obesity agent
- Within 10 years of approval, cases of psychiatric reactions due to misuse were reported [23]
- Several cases of abuse and dependence (with psychoses) were subsequently reported [24]
- Withdrawn from the market in 1970

### **Mazindol**

- Mechanism of action: norepinephrine-dopamine releasing agent
- Approved as an anti-obesity drug in 1970
- Neurotoxicity due to an interaction with lithium reported in 1980 [25]
- Several cases of testicular pain attributed to its use also reported [26]
- Further cases of psychiatric adverse reactions subsequently published [27]
- Withdrawn from the market in 1987

### **Meferonex**

- Mechanism of action: serotonin-norepinephrine-dopamine releasing agent
- Approved for treatment of obesity in 1966
- Serious neuropsychiatric adverse reactions due to abuse reported in 1995
- Withdrawn in Europe four years later [28]

### **Metamphetamine**

- Mechanism of action: serotonin-norepinephrine-dopamine releasing agent
- First approved for obesity treatment in 1944

- Cases of abuse-related suspected psychiatric adverse reactions first appeared 10 years later [29]
- Several cases of abuse resulting in neurotoxicity or cardiotoxicity subsequently reported
- By 1968 reports of deaths from its use had appeared [30]
- A further case series of harms was reported two years later [31]
- Withdrawn in 1973

### **Phendimetrazine**

- Mechanism of action: Norepinephrine-dopamine releasing agent
- First approved for obesity management in 1961
- Cases of abuse were first reported in 1979 [32]
- Withdrawn in 1982

### **Phenmetrazine**

- Mechanism of action: norepinephrine-dopamine releasing agent
- First approved for management of obesity in 1956
- Cases of drug abuse and addiction appeared within three years of approval [33]
- Withdrawn as an anti-obesity agent in 1982

### **Pentermine**

- Mechanism of action: norepinephrine-dopamine releasing agent
- First approved in 1959
- Several cases of lung phospholipidosis in animals and humans reported thereafter
- Reports of deaths began to appear in 1974 [34]
- Withdrawn from most countries where it was marketed in 1981
- Still available for short-term management of obesity in the USA

### **Phenylpropanolamine (norpseudoephedrine)**

- Mechanism of action: norepinephrine-dopamine releasing agent
- Initially used as a nasal decongestant
- Introduced in 1947 for obesity
- Cases of psychosis attributed to its use began to appear in 1966 [35]
- Cases of intracranial haemorrhage reported in 1985 [36]
- Withdrawn within two years of the reports of haemorrhages

### **Pipradrol**

- Mechanism of action: norepinephrine-dopamine reuptake inhibitor
- Approved as an adjunct to dietary management of obesity in 1953
- Associated with several cases of drug abuse [37]
- Withdrawn as an anti-obesity agent in 1982
- Still available for management of ADHD and narcolepsy

### **Pyrovalerone**

- Mechanism of action: norepinephrine-dopamine releasing agent
- Introduced as a weight loss drug in 1974
- Within a year of introduction, cases of abuse started to appear [38]
- Withdrawn as an anti-obesity 1979 owing to problems associated with abuse and dependence
- A derivative, methylenedioxypropylamphetamine (MDPV), is marketed illegally as a designer recreational drug under the name of “Bath Salts” [39]

### **Rimonabant**

- Mechanism of action: cannabis CB<sub>1</sub> receptor antagonist/inverse agonist
- Approved in Europe in 2006 for obesity treatment
- Within 1 year of approval, cases of severe psychiatric adverse reactions were reported [40]
- 5 deaths attributed to its use in the UK
- Withdrawn in 2007

### **Sibutramine**

- Mechanism of action: serotonin-norepinephrine reuptake inhibitor
- Approved in 1997 in the USA and Europe in 2001
- Within a year of its European approval, serious cardiovascular adverse reactions were reported, resulting in temporary withdrawal in Italy [41]
- Several cases of severe cardiovascular adverse reactions, including deaths, subsequently reported [42]
- Withdrawn in Europe and the USA in 2010

## REFERENCES

---

- 1 Rigo P, Collignon P, Booz J. A propos d'un cas de syndrome de pickwick. [A case of Pickwickian syndrome.] *Acta Clin Belg* 1974; 29(3): 168-75.
- 2 Thomas SH, Butt AY, Corris PA, Egan JJ, Higenbottam TW, Madden BP, Waller PC. Appetite suppressants and primary pulmonary hypertension in the United Kingdom. *Br Heart J* 1995; 74(6): 660-3.
- 3 Lesses MF, Myerson A. Human autonomic pharmacology. XVI. Benzedrine sulfate as an aid in the treatment of obesity. *N Engl J Med* 1938; 218: 119-124.
- 4 Simpson WS. Toxic psychosis; a complication of overdosage of anti-obesity drugs. *J Kans Med Soc* 1957; 58(8): 524-7.
- 5 Johnson J, Milner G. Johnson J, Milner G. Amphetamine intoxication and dependence in admissions to a psychiatric unit. *Br J Psychiatry* 1966; 112(487): 617-9.
- 6 Kalant H, Kalant OJ. Death in amphetamine users: causes and rates. *Can Med Assoc J* 1975; 112(3): 299-304.
- 7 Fishman AP. Aminorex to fen/phen: an epidemic foretold. *Circulation* 1999; 99(1): 156-61.
- 8 Fournier A, Zureik M. Estimate of deaths due to valvular insufficiency attributable to the use of benfluorex in France. *Pharmacoepidemiol Drug Saf* 2012; 21(4): 343-51.
- 9 Levin J, Trafford JAP, Newland PM, Bishop PMF. *Practitioner* 1963; 191: 65.
- 10 Seaton DA, Rose K, Duncan LJP. *Practitioner* 1964; 193: 698.
- 11 Franken G, Lüllmann H, Siegfriedt A. Über ein Massenhaftes Auftreten von "Schaumzellen" in Rattenlungen nach chronischer Gabe von Chlorphentermin. [A massive appearance of "foam cells" in rat lungs following chronic administration of chlorphentermine.] *Naunyn Schmiedebergs Arch Pharmakol* 1970; 266(4): 323-4.
- 12 Parwaresch R, Reil GH, Seiler KU. Über die Tier- und Organspezifität morphologischer Veränderungen nach chronischer Chlorphentermingabe. [Studies on animal and organ specificity of chlorphentermine induced morphological alterations.] *Res Exp Med (Berl)* 1973; 161(4): 272-88.
- 13 Cornaert P, Camblin J, Graux P, Anaye B, Dutoit A, Crocchel L. Cardiomyopathie congestive au cours d'une toxicomanie à un anorexigène, le clobenzorex. [Congestive cardiomyopathy in addiction to clobenzorex, an anorexigenic drug.] *Arch Mal Coeur Vaiss* 1986; 79(4): 515-8.
- 14 Magnusson G, Magnusson O. Cloforex-induced pulmonary changes in rats. *Beitr Pathol* 1972; 146(1): 79-88.
- 15 Cacoub P, Dorent R, Nataf P, Houppé JP, Piette JC, Godeau P, Gandjbakhch I. Pulmonary hypertension and dexfenfluramine. *Eur J Clin Pharmacol* 1995; 48(1): 81-3.
- 16 Ferrari E, Draï E, Jourdan J, Sanchez B, Baudouy M, Morand P. Hypertension artérielle pulmonaire sévère compliquant un long traitement par la dexfenfluramine. [Severe pulmonary hypertension complicating a long treatment with dexfenfluramine.] *Arch Mal Coeur Vaiss* 1994; 87(2): 285-6.
- 17 Douglas JG, Munro JF, Kitchin AH, Muir AL, Proudfoot AT. Pulmonary hypertension and fenfluramine. *Br Med J (Clin Res Ed)* 1981; 283(6296): 881-3.
- 18 World Health Organization. WHO Expert Committee on Drug Dependence. [http://apps.who.int/iris/bitstream/10665/39635/1/WHO\\_TRS\\_729.pdf](http://apps.who.int/iris/bitstream/10665/39635/1/WHO_TRS_729.pdf) [Accessed 1st August, 2016].

- 
- 19 European Commission. List of the names of the medicinal products, marketing authorisation holders, pharmaceutical forms, strengths, route of administration, packaging, and package sizes in the member states. [http://ec.europa.eu/health/documents/community-register/2000/200003093430/anx\\_3430\\_en.pdf](http://ec.europa.eu/health/documents/community-register/2000/200003093430/anx_3430_en.pdf) [Last accessed 1st August, 2016].
  - 20 Connolly HM, Crary JL, McGoon MD, Hensrud DD, Edwards BS, Edwards WD, Schaff HV. Valvular heart disease associated with fenfluramine-phentermine. *N Engl J Med*. 1997 Aug 28;337(9):581-8.
  - 21 Silva OA, Yonamine M, Antunes CLG, Greve JMD, Midio AF. Fenproporex abuse by truck drivers in Brazil. Presented at the 1998 Joint SOFT-TIAFT International meeting, Albuquerque, NM. 1998.
  - 22 Paumgarten FJ, Pereira SS, de Oliveira AC. Safety and efficacy of fenproporex for obesity treatment: a systematic review. *Rev Saude Publica* 2016; 50: 25.
  - 23 Schinko H, Solms W. Eine Psychose bei Adipexsuchtigkeit. [A psychosis in adipex addiction.] *Wien Z Nervenheilkd Grenzgeb* 1954; 9(3): 290-301.
  - 24 Simpson WS. Toxic psychosis; a complication of overdosage of anti-obesity drugs. *J Kans Med Soc* 1957; 58(8): 524-7.
  - 25 Hendy MS, Dove AF, Arblaster PG. Mazindol-induced lithium toxicity. *Br Med J* 1980; 280(6215): 684-5.
  - 26 McEwen J, Meyboom RH. Testicular pain caused by mazindol. *Br Med J (Clin Res Ed)* 1983; 287(6407): 1763-4.
  - 27 Rihmer Z, Révai K, Arató M, Perényi A. Two case reports of mazindol-induced depression. *Am J Psychiatry* 1984; 141(11): 1497-8.
  - 28 World Health Organization. Anorectic agents – withdrawal of marketing authorizations recommended: EC, Portugal. *WHO Pharmac Newslett* 1999, No. 09&12.
  - 29 Carr RB. Acute psychotic reaction after inhaling methylamphetamine. *Br Med J* 1954; 1(4877): 1476.
  - 30 Cravey RH, Baselt RC. Methamphetamine poisoning. *J Forensic Sci Soc* 1968; 8(2): 118-20.
  - 31 Smith DE, Fischer CM. An analysis of 310 cases of acute high-dose methamphetamine toxicity in Haight-Ashbury. *Clin Toxicol* 1970; 3(1): 117-24.
  - 32 Jain NC, Budd RD, Sneath TC. Frequency of use or abuse of amphetamine-related drugs. *Am J Drug Alcohol Abuse*. 1979;6(1):53-7.
  - 33 Evans J. Psychosis and addiction to phenmetrazine (Preludin). *Lancet* 1959; 2(7095): 152-5.
  - 34 Price K. "Case Notes: Phentermine," *Bull Int Assoc Foren Toxicol* 1974; 10(1): 12.
  - 35 Kane FJ Jr, Green BQ. Psychotic episodes associated with the use of common proprietary decongestants. *Am J Psychiatry* 1966; 123(4): 484-7.
  - 36 Kikta DG, Devereaux MW, Chandar K. Intracranial hemorrhages due to phenylpropanolamine. *Stroke* 1985; 16(3): 510-2.
  - 37 Goldberg L. Drug abuse in Sweden. *Bull Narcot* 1968; 1: 1-31. <http://www.lycaemum.org/research/researchpdfs/1722.pdf> [Last accessed 20th July, 2016].
  - 38 Deniker P, Lôo H, Cuche H, Roux JM. Utilisation abusive par les toxicomanes d'un psycho-stimulant, la pyrovalérone [Abuse of pyrovalerone by drug addicts.] *Ann Med Psychol (Paris)* 1975; 2(4): 745-8.
  - 39 Prosser JM, Nelson LS. The toxicology of bath salts: a review of synthetic cathinones. *J Med Toxicol*. 2012; 8(1): 33-42.

---

40 Gadde KM. Effect of rimonabant on weight and cardiometabolic risk factors. *JAMA*. 2006 Aug 9;296(6):649-50; author reply 650-1.

41 Anonymous. Italy suspends sibutramine licence. *Pharm J* 2002; 268(7190): 385-391.

42 Woollorton E. Obesity drug sibutramine (Meridia): hypertension and cardiac arrhythmias. *CMAJ*. 2002;166(10):1307-8.
